# Supplementary material for: Tetrameric c-di-GMP Mediates Effective Transcription Factor Dimerization to Control Streptomyces Development
Source: PubMed Central journal article supplement (PMC4151990; doi:10.1016/j.cell.2014.07.022), 2014-08-28
Supplement: mmc1.pdf [file mmc1.pdf]

**Table S1. Selected MAD Statistics for P3<sub>2</sub> BldD CTD-c-di-GMP Data, Related to Figures 4 and 5**

|                                   |                         |                    |                   |
|-----------------------------------|-------------------------|--------------------|-------------------|
| Wavelength (Å)                    | 0.979 (Peak)            | 0.979 (Inflection) | 0.923 (Remote)    |
| Space group                       | P3 <sub>2</sub>         | P3 <sub>2</sub>    | P3 <sub>2</sub>   |
| a, b, c (Å)                       | a=b=86.5, c=151.5       | a=b=86.5, c=151.5  | a=b=86.5, c=151.5 |
| α, β, γ (°)                       | 90, 90, 120             | 90, 90, 120        | 90, 90, 120       |
| Resolution (Å)                    | 75.4-2.28               | 75.4-2.28          | 75.4-2.28         |
| R <sub>sym</sub> (%) <sup>a</sup> | 5.7 (18.9) <sup>b</sup> | 4.6 (44.3)         | 5.0 (30.9)        |
| I/σ(I)                            | 15.5 (3.0)              | 14.2 (2.3)         | 13.8 (2.5)        |
| Total reflections (#)             | 317916                  | 118771             | 72566             |
| Unique reflections (#)            | 59112                   | 36721              | 9226              |

<sup>a</sup>R<sub>sym</sub> =  $\frac{\sum \sum |I_{hkl} - I_{hkl(j)}|}{\sum I_{hkl}}$ , where I<sub>hkl</sub> is observed intensity and I<sub>hkl(j)</sub> is the final average value of intensity.

<sup>b</sup>Values in parentheses are for the highest resolution shell.

**Table S2. Selected Crystallographic Refinement Statistics for BldD CTD-c-di-GMP Structures, Related to Figures 4, 5, and 7**

| Complex                                               | <i>S. venezuelae</i><br>BldD C-domain-<br>(c-di-GMP)<br>(form 1) | <i>S. venezuelae</i><br>BldD C-domain-<br>(c-di-GMP)<br>(form 2) | <i>S. venezuelae</i><br>BldD C-domain-<br>(c-di-GMP)<br>(form 3) | <i>S. coelicolor</i> BldD<br>C-domain-<br>(c-di-GMP) |
|-------------------------------------------------------|------------------------------------------------------------------|------------------------------------------------------------------|------------------------------------------------------------------|------------------------------------------------------|
| <b>Data Collection</b>                                |                                                                  |                                                                  |                                                                  |                                                      |
| Space group                                           | P3 <sub>2</sub>                                                  | P2 <sub>1</sub> 2 <sub>1</sub> 2                                 | C222 <sub>1</sub>                                                | C222 <sub>1</sub>                                    |
| a, b, c (Å)                                           | a=b=86.5,<br>c=151.5                                             | a=136.5,<br>b=98.8,<br>c=68.8                                    | a=36.2,<br>b=95.5,<br>c=99.5                                     | a=36.9,<br>b=95.5,<br>c=100.1                        |
| α, β, γ (°)                                           | 90, 90, 120                                                      | 90, 90, 90                                                       | 90, 90, 90                                                       | 90, 90, 90                                           |
| Resolution (Å)                                        | 75.8-1.95                                                        | 98.8-2.33                                                        | 99.6-1.75                                                        | 34.6-2.25                                            |
| R <sub>sym</sub> (%) <sup>a</sup>                     | 5.7 (57.9) <sup>b</sup>                                          | 4.6 (44.3)                                                       | 4.1 (38.5)                                                       | 5.0 (30.9)                                           |
| I/σI                                                  | 11.4 (1.9)                                                       | 14.2 (2.3)                                                       | 14.6 (2.6)                                                       | 13.8 (2.5)                                           |
| Total reflections (#)                                 | 322678                                                           | 118771                                                           | 57815                                                            | 72566                                                |
| Unique reflections (#)                                | 90983                                                            | 36721                                                            | 17271                                                            | 9226                                                 |
| <b>Refinement</b>                                     |                                                                  |                                                                  |                                                                  |                                                      |
| R <sub>work</sub> /R <sub>free</sub> (%) <sup>c</sup> | 19.8/24.4                                                        | 22.6/26.9                                                        | 19.8/21.9                                                        | 22.6/25.6                                            |
| <b>Ramachandran analysis</b>                          |                                                                  |                                                                  |                                                                  |                                                      |
| Most Favored (%/#)                                    | 91.8/752                                                         | 84.3/452                                                         | 92.1/117                                                         | 94.4/117                                             |
| Add. Favored (%/#)                                    | 8.7/67                                                           | 14.7/79                                                          | 7.9/10                                                           | 5.6/7                                                |
| Allowed (%/#)                                         | 0.0/0                                                            | 0.9/5                                                            | 0.0/0                                                            | 0.0/0                                                |
| Outlier (%/#)                                         | 0.0/0                                                            | 0.0/0                                                            | 0.0/0                                                            | 0.0/0                                                |
| <b>Rmsd</b>                                           |                                                                  |                                                                  |                                                                  |                                                      |
| Bond lengths (Å)                                      | 0.020                                                            | 0.017                                                            | 0.008                                                            | 0.017                                                |
| Bond angles (Å)                                       | 1.99                                                             | 2.04                                                             | 1.32                                                             | 2.03                                                 |

<sup>a</sup>R<sub>sym</sub> =  $\frac{\sum |I_{hkl} - I_{hkl}(j)|}{\sum I_{hkl}}$ , where I<sub>hkl</sub> is observed intensity and I<sub>hkl</sub>(j) is the final average value of intensity.

<sup>b</sup>Values in parentheses are for the highest resolution shell.

<sup>c</sup>R<sub>work</sub> =  $\frac{\sum |F_{obs} - F_{calc}|}{\sum |F_{obs}|}$  and R<sub>free</sub> =  $\frac{\sum |F_{obs} - F_{calc}|}{\sum |F_{obs}|}$ ; where all reflections belong to a test set of 5% randomly selected data.

**Table S3. Strains and Plasmids Used in this Study, Related to Experimental Procedures**

|                      | Relevant genotype/comments                                                                                                                                                    | Source or reference         |
|----------------------|-------------------------------------------------------------------------------------------------------------------------------------------------------------------------------|-----------------------------|
| <b>Strains</b>       |                                                                                                                                                                               |                             |
| <i>S. venezuelae</i> |                                                                                                                                                                               |                             |
| ATCC 10712           | Wild type                                                                                                                                                                     | (Bibb et al., 2012)         |
| SV70                 | <i>attB<sub>ϕBT1</sub>::pIJ10350 (ermEp* - cdgB)</i> ; Hyg <sup>R</sup>                                                                                                       | This study                  |
| SV71                 | <i>attB<sub>ϕBT1</sub>::pIJ10659 (ermEp* - yhjH)</i> ; Hyg <sup>R</sup>                                                                                                       | This study                  |
| SV77                 | <i>ΔbldD::apr</i> ; Apr <sup>R</sup> (Redirect)                                                                                                                               | This study                  |
| SV74                 | <i>ΔbldD::apr</i> ; Apr <sup>R</sup> (SV1-transduction)                                                                                                                       | This study                  |
| SVNT6                | <i>attB<sub>ϕBT1</sub>::pSVNT5 (ermEp* - cdgB-G472A)</i> ; Hyg <sup>R</sup>                                                                                                   | This study                  |
| SVNT8                | <i>attB<sub>ϕBT1</sub>::pSVNT4 (ermEp* - yhjH-E48A)</i> ; Hyg <sup>R</sup>                                                                                                    | This study                  |
| SVNT9                | <i>ΔbldD::apr</i> ; Apr <sup>R</sup> <i>attB<sub>ϕBT1</sub>::pIJ10350 (ermEp* - cdgB)</i> ; Hyg <sup>R</sup>                                                                  | This study                  |
| SVNT12               | <i>ΔbldD::apr</i> ; Apr <sup>R</sup> <i>attB<sub>ϕBT1</sub>::pSVNT7 (pMS82-bldD R114D, D116R, R125D, D128R)</i> ; Hyg <sup>R</sup>                                            | This study                  |
| <i>E. coli</i>       |                                                                                                                                                                               |                             |
| ET12567/pUZ8002      | <i>dam, dcm, hsd</i> , Kan <sup>R</sup> , Cm <sup>R</sup>                                                                                                                     | (Paget et al., 1999)        |
| BW25113/pIJ790       | ( <i>Δ(araD-araB)567, ΔlacZ4787(::rrnB-4), lacIp-4000(lacI<sup>Q</sup>), λ-, rpoS369(Am), rph-1, Δ(rhaD-rhaB)568, hsdR514</i> ; Cm <sup>R</sup>                               | (Datsenko and Wanner, 2000) |
| BL21(DE3)/pLysS      | F <sup>-</sup> <i>ompT hsdS<sub>(rB-mB-)</sub> gal dcm λ(DE3)</i> , Cm <sup>R</sup>                                                                                           | Promega                     |
| DH5α                 | F <sup>-</sup> endA1 glnV44 thi-1 recA1 relA1 gyrA96 deoR nupG Φ80dlacZΔM15 Δ( <i>lacZYA-argF</i> )U169, hsdR17(r <sub>K</sub> <sup>-</sup> m <sub>K</sub> <sup>+</sup> ), λ- | (Hanahan, 1985)             |
| <b>Plasmids</b>      |                                                                                                                                                                               |                             |
| pIJ773               | Plasmid template for amplification of the <i>apr-oriT</i> cassette for 'Redirect' PCR-targeting                                                                               | (Gust et al., 2003)         |
| pIJ790               | Modified λ RED recombination plasmid [ <i>oriR101</i> ] [ <i>repA101(ts)</i> ] <i>araBp-gam-be-exo</i> , Cm <sup>R</sup>                                                      | (Gust et al., 2003)         |
| pUZ8002              | RP4 derivative with defective oriT, Kan <sup>R</sup>                                                                                                                          | (Paget et al., 1999)        |
| pET15b               | T7 expression vector, Amp <sup>R</sup>                                                                                                                                        | Novagen                     |
| pIJ10257             | Plasmid integrating at the ϕBT1 <i>attB</i> attachment site containing the constitutive <i>ermEp*</i> promoter, Hyg <sup>R</sup>                                              | (Hong et al., 2005)         |
| pIJ10350             | pIJ10257 carrying <i>cdgB</i> from <i>S.coelicolor</i>                                                                                                                        | (Tran et al., 2011)         |
| pIJ10659             | pIJ10257 carrying N-terminally codon optimised <i>yhjH</i> from <i>E. coli</i>                                                                                                | This study                  |
| pIJ10663             | pET15b- <i>bldD</i> -Full                                                                                                                                                     | This study                  |
| pIJ10661             | pET15b- <i>bldD</i> -NTD                                                                                                                                                      | This study                  |
| pIJ10660             | pET15b- <i>bldD</i> -CTD                                                                                                                                                      | This study                  |
| pIJ10674             | pET15b- <i>bldD</i> R114D, D116R, R125D, D128R                                                                                                                                | This study                  |
| pIJ10676             | pET15b- <i>bldD</i> R125D, D128R                                                                                                                                              | This study                  |
| pIJ10677             | pET15b- <i>bldD</i> R114D, D116R                                                                                                                                              | This study                  |

|          |                                                                                      |            |
|----------|--------------------------------------------------------------------------------------|------------|
| pIJ10668 | pET15b- <i>bldD</i> -CTD L92M                                                        | This study |
| pIJ10678 | pET15b- <i>bldD</i> -CTD L92M, I135M                                                 | This study |
| pSVNT4   | pIJ10257 carrying N-terminally codon optimised <i>yjhH</i> -E48A from <i>E. coli</i> | This study |
| pSVNT5   | pIJ10257 carrying <i>cdgB</i> -G472A from <i>S.coelicolor</i>                        | This study |
| pSVNT7   | pMS82- <i>bldD</i> R114D, D116R, R125D, D128R                                        | This study |

**Table S4. Oligonucleotides Used in this Study, Related to Experimental Procedures**

Nucleotides in italics indicate restriction sites and nucleotides in bold represent mutations introduced

| Oligonucleotide                                                                                                            | Sequence                                                                     |
|----------------------------------------------------------------------------------------------------------------------------|------------------------------------------------------------------------------|
| <b>Oligonucleotides used for cloning of <i>bldD</i>-full, <i>bldD</i>-NTD and <i>bldD</i>-CTD into pET15b</b>              |                                                                              |
| bldDSVfull-NdeI-fw                                                                                                         | GGTGGT <i>CATATG</i> TCCAGCGAATACGCAAAGCAGC                                  |
| bldDSVfull-BamHI-rev                                                                                                       | CTCCTC <i>GGATC</i> CTCAGTTCCTCGTGGGCGACG                                    |
| bldDSVntd-BamHI-rev                                                                                                        | CTCCTC <i>GGATC</i> CTCAGGCGGCCCGCCCGGAGTCG                                  |
| bldDSVctd-NdeI-fw                                                                                                          | GGTGGT <i>CATATG</i> GAGCCGCCCGAAGCTCGTCC                                    |
| <b>Oligonucleotides used for mutagenesis of <i>bldD</i></b>                                                                |                                                                              |
| bldD-L92M-fw                                                                                                               | CTGGAGCGC <b>ATG</b> GCGCACGTC                                               |
| bldD-L92M-rev                                                                                                              | GACGTGCGCC <b>ATG</b> CGCTCCAG                                               |
| bldD-I135M-fw                                                                                                              | CTGGCCGT <b>GATG</b> TACGACCAGTC                                             |
| bldD-I135M-rev                                                                                                             | GACTGGTCGTAC <b>ATC</b> ACGGCCAG                                             |
| bldD R114D, D116R fw                                                                                                       | ATCCAGTCGCAG <b>GAC</b> GCC <b>GCT</b> TACAACGGCAAG                          |
| bldD R114D, D116R rev                                                                                                      | CTTGCCGTTGTAG <b>CG</b> CC <b>GTC</b> CTGCGACTGGAT                           |
| bldD R125D, D128R fw                                                                                                       | GTGCTGTCGATCG <b>ACC</b> AG <b>ACCGT</b> CTGCGCACCCCTG                       |
| bldD R125D, D128R rev                                                                                                      | CAGGGTGCAG <b>AC</b> G <b>GTC</b> CT <b>GTC</b> GATCGACAGCAC                 |
| <b>Oligonucleotides used for cloning of <i>yhjH</i> and <i>cdgB</i> into pIJ10257</b>                                      |                                                                              |
| yhjH-NdeI-fw                                                                                                               | GGTGGT <i>CATATG</i> ATCCGCCAGGTCATCCAGCGCATCTCCAACCCTGAAG<br>CAAGCATCGAGAGC |
| yhjH-HindIII-rev                                                                                                           | CGT <b>AAGCTT</b> TTCATAGCGCCAGAACCGCCGTA                                    |
| cdgBSCO-NdeI-fw                                                                                                            | CGTGGT <i>CATATG</i> GAGACCGACTCGGAGCC                                       |
| cdgBSCO-HindIII-rev                                                                                                        | CGT <b>AAGCTT</b> TTCATCCGGCGCGGGTGTCTG                                      |
| <b>Oligonucleotides used for generating DNA fragments for gel retardation assays</b>                                       |                                                                              |
| pblDMSV-pcr-fw                                                                                                             | CTAGCCACAGACACCGCG                                                           |
| pblDMSV-pcr-rev                                                                                                            | CGACGGTCACTCGAAAGAG                                                          |
| pwhiGSV-pcr-fw                                                                                                             | GTTCGAAGATGTGGCCGAC                                                          |
| pwhiGSV-pcr-rev                                                                                                            | GCGTTGCCTTGAGCCGTTT                                                          |
| <b>Oligonucleotides used for amplification of the <i>oriT</i>-<i>apr</i> cassette with <i>bldD</i>-specific extensions</b> |                                                                              |
| bldD sense                                                                                                                 | GCGCAGCCGCATGTCGTCACAGCGTCCGGGAGCGTTATGATTCCGGGG<br>ATCCGTCGACC              |
| bldD disruption R2                                                                                                         | TCTGCTGGGTCCCCGTAAGGGGTT <b>CAGT</b> TCTCCTCGTGGTGTAGGCTGG<br>AGCTGCTTC      |

**Oligonucleotides used for verification of the *bldD* mutant and for cloning into pMS82**

bldDSV-HindIII-pMS82-fw      GGTGGT*AAGCTT*GAAGAAACGGACCTCCTTCTCC

bldDSV-KpnI-pMS82-rev      AGTAGTGGT*ACCGTCCG*TAGACGTCACCGGCAGTCG

---

## SUPPLEMENTAL REFERENCES

Adams, P.D. *et al.* (2010). PHENIX: a comprehensive Python-based system for macromolecular structure solution. *Acta Crystallogr. D Biol. Crystallogr.* *66*, 213-221.

Bibb, M.J., Domonkos, Á., Chandra, G., and Buttner, M.J. (2012). Expression of the chaplin and rodlin hydrophobic sheath proteins in *Streptomyces venezuelae* is controlled by  $\sigma^{\text{BldN}}$  and a cognate anti-sigma factor, RsbN. *Mol. Microbiol.* *84*, 1033-1049.

Bush, M.J., Bibb, M.J., Chandra, G., Findlay, K.C., and Buttner, M.J. (2013). Genes required for aerial growth, cell division and chromosome segregation are targets of WhiA before sporulation in *Streptomyces venezuelae*. *mBio* *4*, e00684-13.

Datsenko, K.A., and Wanner, B.L. (2000). One-step inactivation of chromosomal genes in *Escherichia coli* K-12 using PCR products. *Proc. Natl. Acad. Sci. USA* *97*, 6640-6645.

Germer, J., Becker, G., Metzner, M., and Hengge-Aronis, R. (2001). Role of activator site position and a distal UP-element half-site for sigma factor selectivity at a CRP/H-NS activated  $\sigma^{\text{S}}$ -dependent promoter in *Escherichia coli*. *Mol. Microbiol.* *41*, 705–716.

Gust, B., Challis, G.L., Fowler, K., Kieser, T., and Chater, K.F. (2003). PCR-targeted *Streptomyces* gene replacement identifies a protein domain needed for biosynthesis of the sesquiterpene soil odor geosmin. *Proc. Natl. Acad. Sci. USA* *100*, 1541-1546.

Gust, B., Chandra, G., Jakimowicz, D., Yuqing, T., Bruton, C., and Chater K.F. (2004). Lambda red-mediated genetic manipulation of antibiotic-producing *Streptomyces*. *Adv. Appl. Microbiol.* *54*, 107-128.

Hanahan, D. (1985). In *DNA Cloning: A Practical Approach*, D.M. Glover, ed. (McLean, Virginia: IRL Press), p. 109.

Hong, H.J., Hutchings, M.I., Hill, L.M., and Buttner, M.J. (2005). The role of the novel Fem protein VanK in vancomycin resistance in *Streptomyces coelicolor*. *J. Biol. Chem.* *280*, 13055-13061.

Kieser, T., Bibb, M.J., Buttner, M.J., Chater, K.F. and Hopwood, D.A. (2000). *Practical Streptomyces Genetics*. The John Innes Foundation, Norwich, United Kingdom.

McCoy, A.J., Crosse-Kunstleve, R.W., Adams, P.D., Winn, M.D., Storoni, L.C., and Read, R.J. (2007). Phaser crystallographic software. *J. Appl. Crystallogr.* *40*, 658-674.

Molle, V., Palframan, W.J., Findlay, K.C., and Buttner, M.J. (2000). WhiD and WhiB, homologous proteins required for different stages of sporulation in *Streptomyces coelicolor* A3(2). *J. Bacteriol.* *182*, 1286-1295.

Nesper, J., Reinders, A., Glatter, T., Schmidt, A., and Jenal, U. (2012). A novel capture compound for the identification and analysis of cyclic di-GMP binding proteins. *J. Proteomics.* *75*, 4874-4878.

Paget, M.S., Chamberlin, L., Atrih, A., Foster, S.J., and Buttner, M.J. (1999). Evidence that the extracytoplasmic function sigma factor  $\sigma^E$  is required for normal cell wall structure in *Streptomyces coelicolor* A3(2). *J. Bacteriol.* *181*, 204-211.

Paul, R., Weiser, S., Amiot, N.C., Chan, C., Schirmer, T., Giese, B., and Jenal, U. (2004). Cell cycle-dependent dynamic localization of a bacterial response regulator with a novel di-guanylate cyclase output domain. *Genes Dev.* *18*, 715-727.

Pesavento, C., Becker, G., Sommerfeldt, N., Possling, A., Tschowri, N., Mehlis, A., and Hengge, R. (2008). Inverse regulatory coordination of motility and curli-mediated adhesion in *Escherichia coli*. *Genes Dev.* *22*, 2434-2446.

Roelofs, K.G., Wang, J., Sintim, H.O., and Lee, V.T. (2011). Differential radial capillary action of ligand assay for high-throughput detection of protein-metabolite interactions. *Proc. Natl. Acad. Sci. USA* *108*, 15528-33.

Stuttard, C. (1979). Transduction of auxotrophic markers in a chloramphenicol-producing strain of *Streptomyces*. *J. Gen. Microbiol.* *110*, 479-82.

Stuttard, C. (1982). Temperate phages of *Streptomyces venezuelae*: lysogeny and host specificity shown by phages SV1 and SV2. *Microbiology* *128*, 115-121.



Terwilliger, T.C., and Berendzen, J. (1999). Automated MAD and MIR structure solution. *Acta Crystallogr. Sect. D: Biol. Crystallogr.* 55, 849-861.

Tran, N.T., Den Hengst, C.D., Gomez-Escribano, J.P., and Buttner, M.J. (2011). Identification and characterization of CdgB, a diguanylate cyclase involved in developmental processes in *Streptomyces coelicolor*. *J. Bacteriol.* 193, 3100-3108.
